# Supplementary material for: Tailoring phase transition temperatures in perovskites via A-site vacancy generation
Source: Royal Society of Chemistry journal article supplement (doi:10.1039/c7dt00352h), 2017-01-01
Supplement: c7dt00352h1.pdf [file c7dt00352h1.pdf]

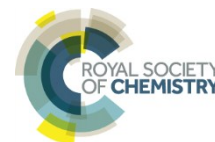

## Journal Name

ARTICLE

## Supplementary Information

Table S1: Bond valence sums for each metal site calculated for structures resulting from refinements against synchrotron X-ray powder diffraction data.

|                                                                            | Sr(II) | Ti(IV) | Zr(IV) | Nb(V) |
|----------------------------------------------------------------------------|--------|--------|--------|-------|
| $\text{Sr}_{0.8}\text{Ti}_{0.6}\text{Nb}_{0.4}\text{O}_3$                  | 2.02   | 4.01   | -      | 5.20  |
| $\text{Sr}_{0.8}\text{Ti}_{0.54}\text{Zr}_{0.06}\text{Nb}_{0.4}\text{O}_3$ | 1.96   | 3.93   | 5.34   | 5.10  |
| $\text{Sr}_{0.8}\text{Ti}_{0.48}\text{Zr}_{0.12}\text{Nb}_{0.4}\text{O}_3$ | 1.91   | 3.86   | 5.24   | 5.00  |
| $\text{Sr}_{0.8}\text{Ti}_{0.36}\text{Zr}_{0.24}\text{Nb}_{0.4}\text{O}_3$ | 1.82   | 3.72   | 5.05   | 4.83  |
| $\text{Sr}_{0.8}\text{Ti}_{0.24}\text{Zr}_{0.36}\text{Nb}_{0.4}\text{O}_3$ | 1.76   | 3.59   | 4.87   | 4.65  |
| $\text{Sr}_{0.8}\text{Ti}_{0.12}\text{Zr}_{0.48}\text{Nb}_{0.4}\text{O}_3$ | 1.72   | 3.44   | 4.67   | 4.46  |
| $\text{Sr}_{0.8}\text{Zr}_{0.6}\text{Nb}_{0.4}\text{O}_3$                  | 1.67   | -      | 4.49   | 4.29  |

Table S2: Bond valence sums for each metal site calculated for structures resulting from refinements against neutron powder diffraction data.

|                                                                            | Sr(II) | Ti(IV) | Zr(IV) | Nb(V) |
|----------------------------------------------------------------------------|--------|--------|--------|-------|
| $\text{Sr}_{0.8}\text{Ti}_{0.6}\text{Nb}_{0.4}\text{O}_3$                  | 2.01   | 4.00   | -      | 5.18  |
| $\text{Sr}_{0.8}\text{Ti}_{0.54}\text{Zr}_{0.06}\text{Nb}_{0.4}\text{O}_3$ | 1.96   | 3.93   | 5.34   | 5.10  |
| $\text{Sr}_{0.8}\text{Ti}_{0.48}\text{Zr}_{0.12}\text{Nb}_{0.4}\text{O}_3$ | 1.91   | 3.86   | 5.24   | 5.00  |
| $\text{Sr}_{0.8}\text{Ti}_{0.36}\text{Zr}_{0.24}\text{Nb}_{0.4}\text{O}_3$ | 1.82   | 3.72   | 5.04   | 4.82  |
| $\text{Sr}_{0.8}\text{Ti}_{0.24}\text{Zr}_{0.36}\text{Nb}_{0.4}\text{O}_3$ | 1.77   | 3.57   | 4.85   | 4.63  |
| $\text{Sr}_{0.8}\text{Zr}_{0.6}\text{Nb}_{0.4}\text{O}_3$                  | 1.68   | -      | 4.47   | 4.27  |

Table S3: Tolerance Factors for  $\text{Sr}_{0.8}\text{Ti}_{0.6-x}\text{Zr}_x\text{Nb}_{0.4}\text{O}_3$  and parent compounds. Tolerance factors are calculated such that the A cation is taken to be 100 % strontium and the B cation is a weighted average of the B cations. Ionic radii are taken from Shannon [37]. \*This is theoretical only as this composition does not form with a perovskite type structure<sup>35</sup>.

| Compound                                                                   | Tolerance Factor |
|----------------------------------------------------------------------------|------------------|
| $\text{SrTiO}_3$                                                           | 1.0091           |
| $\text{Sr}_{0.8}\text{Ti}_{0.6}\text{Nb}_{0.4}\text{O}_3$                  | 1.0019           |
| $\text{Sr}_{0.8}\text{Ti}_{0.54}\text{Zr}_{0.06}\text{Nb}_{0.4}\text{O}_3$ | 0.9984           |
| $\text{Sr}_{0.8}\text{Ti}_{0.48}\text{Zr}_{0.12}\text{Nb}_{0.4}\text{O}_3$ | 0.9950           |
| $\text{Sr}_{0.8}\text{Ti}_{0.36}\text{Zr}_{0.24}\text{Nb}_{0.4}\text{O}_3$ | 0.9881           |
| $\text{Sr}_{0.8}\text{Ti}_{0.24}\text{Zr}_{0.36}\text{Nb}_{0.4}\text{O}_3$ | 0.9813           |
| $\text{Sr}_{0.8}\text{Ti}_{0.12}\text{Zr}_{0.48}\text{Nb}_{0.4}\text{O}_3$ | 0.9746           |
| $\text{Sr}_{0.8}\text{Zr}_{0.6}\text{Nb}_{0.4}\text{O}_3$                  | 0.9680           |
| $\text{SrZrO}_3$                                                           | 0.9531           |
| * $\text{Sr}_{0.5}\text{NbO}_3$                                            | 0.9914           |

Table S4: Phase transition temperatures from cubic ( $Pm\bar{3}m$ ) to tetragonal ( $I4/mcm$ ).

| Composition                                                                | Transition Temperature |
|----------------------------------------------------------------------------|------------------------|
| $\text{Sr}_{0.8}\text{Ti}_{0.6}\text{Nb}_{0.4}\text{O}_3$                  | 90 K                   |
| $\text{Sr}_{0.8}\text{Ti}_{0.54}\text{Zr}_{0.06}\text{Nb}_{0.4}\text{O}_3$ | < 298 K                |
| $\text{Sr}_{0.8}\text{Ti}_{0.48}\text{Zr}_{0.12}\text{Nb}_{0.4}\text{O}_3$ | ~ 298 K                |
| $\text{Sr}_{0.8}\text{Ti}_{0.36}\text{Zr}_{0.24}\text{Nb}_{0.4}\text{O}_3$ | > 298 K                |
| $\text{Sr}_{0.8}\text{Ti}_{0.24}\text{Zr}_{0.36}\text{Nb}_{0.4}\text{O}_3$ | 430 K                  |
| $\text{Sr}_{0.8}\text{Ti}_{0.12}\text{Zr}_{0.48}\text{Nb}_{0.4}\text{O}_3$ | 470 K                  |
| $\text{Sr}_{0.8}\text{Zr}_{0.6}\text{Nb}_{0.4}\text{O}_3$                  | 610 K                  |

Table S5: Atomic coordinates and isotropic atomic displacement parameters as determined by refinements against synchrotron X-ray powder diffraction data collected at room temperature

| Composition                                                                            | Atom     | x           | y       | z    | U <sub>iso</sub> |
|----------------------------------------------------------------------------------------|----------|-------------|---------|------|------------------|
| <b>Sr<sub>0.8</sub>Ti<sub>0.6</sub>Nb<sub>0.4</sub>O<sub>3</sub></b>                   | Sr       | 0.5         | 0.5     | 0.5  | 0.00933(8)       |
|                                                                                        | Ti/ Nb   | 0           | 0       | 0    | 0.01119(8)       |
|                                                                                        | O        | 0           | 0       | 0.5  | 0.01220(19)      |
| <b>Sr<sub>0.8</sub>Ti<sub>0.54</sub>Zr<sub>0.06</sub>Nb<sub>0.4</sub>O<sub>3</sub></b> | Sr       | 0.5         | 0.5     | 0.5  | 0.00871(8)       |
|                                                                                        | Ti/ Nb   | 0           | 0       | 0    | 0.00892(7)       |
|                                                                                        | O        | 0           | 0       | 0.5  | 0.0125(2)        |
| <b>Sr<sub>0.8</sub>Ti<sub>0.48</sub>Zr<sub>0.12</sub>Nb<sub>0.4</sub>O<sub>3</sub></b> | Sr       | 0.5         | 0.5     | 0.5  | 0.00970(8)       |
|                                                                                        | Ti/Zr/Nb | 0           | 0       | 0    | 0.00933(8)       |
|                                                                                        | O        | 0           | 0       | 0.5  | 0.0147(2)        |
| <b>Sr<sub>0.8</sub>Ti<sub>0.36</sub>Zr<sub>0.24</sub>Nb<sub>0.4</sub>O<sub>3</sub></b> | Sr       | 0.5         | 0.5     | 0.5  | 0.01068(7)       |
|                                                                                        | Ti/Zr/Nb | 0           | 0       | 0    | 0.00823(6)       |
|                                                                                        | O        | 0           | 0       | 0.5  | 0.0195(2)        |
| <b>Sr<sub>0.8</sub>Ti<sub>0.24</sub>Zr<sub>0.36</sub>Nb<sub>0.4</sub>O<sub>3</sub></b> | Sr       | 0           | 0.5     | 0.25 | 0.00997(5)       |
|                                                                                        | Ti/Zr/Nb | 0           | 0       | 0    | 0.00673(4)       |
|                                                                                        | O1       | 0           | 0       | 0.25 | 0.0265(18)       |
|                                                                                        | O2       | 0.2626(3)   | 0.7626  | 0    | 0.0182(8)        |
| <b>Sr<sub>0.8</sub>Ti<sub>0.12</sub>Zr<sub>0.48</sub>Nb<sub>0.4</sub>O<sub>3</sub></b> | Sr       | 0           | 0.5     | 0.25 | 0.01053(5)       |
|                                                                                        | Ti/Zr/Nb | 0           | 0       | 0    | 0.00642(4)       |
|                                                                                        | O1       | 0           | 0       | 0.25 | 0.0220(5)        |
|                                                                                        | O2       | 0.27276(18) | 0.77276 | 0    | 0.0208(4)        |
| <b>Sr<sub>0.8</sub>Zr<sub>0.6</sub>Nb<sub>0.4</sub>O<sub>3</sub></b>                   | Sr       | 0           | 0.5     | 0.25 | 0.01042(5)       |
|                                                                                        | Zr/Nb    | 0           | 0       | 0    | 0.00621(4)       |
|                                                                                        | O1       | 0           | 0       | 0.25 | 0.0233(4)        |
|                                                                                        | O2       | 0.27787(16) | 0.77787 | 0    | 0.0217(3)        |

Table S6: Atomic coordinates and isotropic atomic displacement parameters as determined by refinements against neutron powder diffraction data collected at room temperature

| Composition                                                                            | Atom     | x           | y       | z    | U <sub>iso</sub> |
|----------------------------------------------------------------------------------------|----------|-------------|---------|------|------------------|
| <b>Sr<sub>0.8</sub>Ti<sub>0.6</sub>Nb<sub>0.4</sub>O<sub>3</sub></b>                   | Sr       | 0.5         | 0.5     | 0.5  | 0.0096(7)        |
|                                                                                        | Ti/ Nb   | 0           | 0       | 0    | 0.014(2)         |
|                                                                                        | O        | 0           | 0       | 0.5  | 0.0066(3)        |
| <b>Sr<sub>0.8</sub>Ti<sub>0.54</sub>Zr<sub>0.06</sub>Nb<sub>0.4</sub>O<sub>3</sub></b> | Sr       | 0           | 0.5     | 0.25 | 0.0072(5)        |
|                                                                                        | Ti/Zr/Nb | 0           | 0       | 0    | 0.0074(13)       |
|                                                                                        | O        | 0           | 0       | 0.5  | 0.0098(3)        |
| <b>Sr<sub>0.8</sub>Ti<sub>0.48</sub>Zr<sub>0.12</sub>Nb<sub>0.4</sub>O<sub>3</sub></b> | Sr       | 0           | 0.5     | 0.25 | 0.0094(4)        |
|                                                                                        | Ti/Zr/Nb | 0           | 0       | 0    | 0.0059(8)        |
|                                                                                        | O        | 0           | 0       | 0.5  | 0.0135(2)        |
| <b>Sr<sub>0.8</sub>Ti<sub>0.36</sub>Zr<sub>0.24</sub>Nb<sub>0.4</sub>O<sub>3</sub></b> | Sr       | 0           | 0.5     | 0.25 | 0.0127(3)        |
|                                                                                        | Ti/Zr/Nb | 0           | 0       | 0    | 0.0087(4)        |
|                                                                                        | O1       | 0           | 0       | 0.25 | 0.0346(10)       |
|                                                                                        | O2       | 0.25645(19) | 0.75645 | 0    | 0.0147(4)        |
| <b>Sr<sub>0.8</sub>Ti<sub>0.24</sub>Zr<sub>0.36</sub>Nb<sub>0.4</sub>O<sub>3</sub></b> | Sr       | 0           | 0.5     | 0.25 | 0.0156(3)        |
|                                                                                        | Ti/Zr/Nb | 0           | 0       | 0    | 0.0102(4)        |
|                                                                                        | O1       | 0           | 0       | 0.25 | 0.0175(8)        |
|                                                                                        | O2       | 0.2667(2)   | 0.7667  | 0    | 0.0290(5)        |
| <b>Sr<sub>0.8</sub>Zr<sub>0.6</sub>Nb<sub>0.4</sub>O<sub>3</sub></b>                   | Sr       | 0           | 0.5     | 0.25 | 0.0144(3)        |
|                                                                                        | Zr/Nb    | 0           | 0       | 0    | 0.0056(3)        |
|                                                                                        | O1       | 0           | 0       | 0.25 | 0.0284(7)        |
|                                                                                        | O2       | 0.27953(18) | 0.77953 | 0    | 0.0227(4)        |
